# Supplementary material
Source: Springer Nature journal article supplement (https://www.springermedizin.de/resource/supplementary/13020_2011_155_MOESM6_ESM.pdf/9641098)

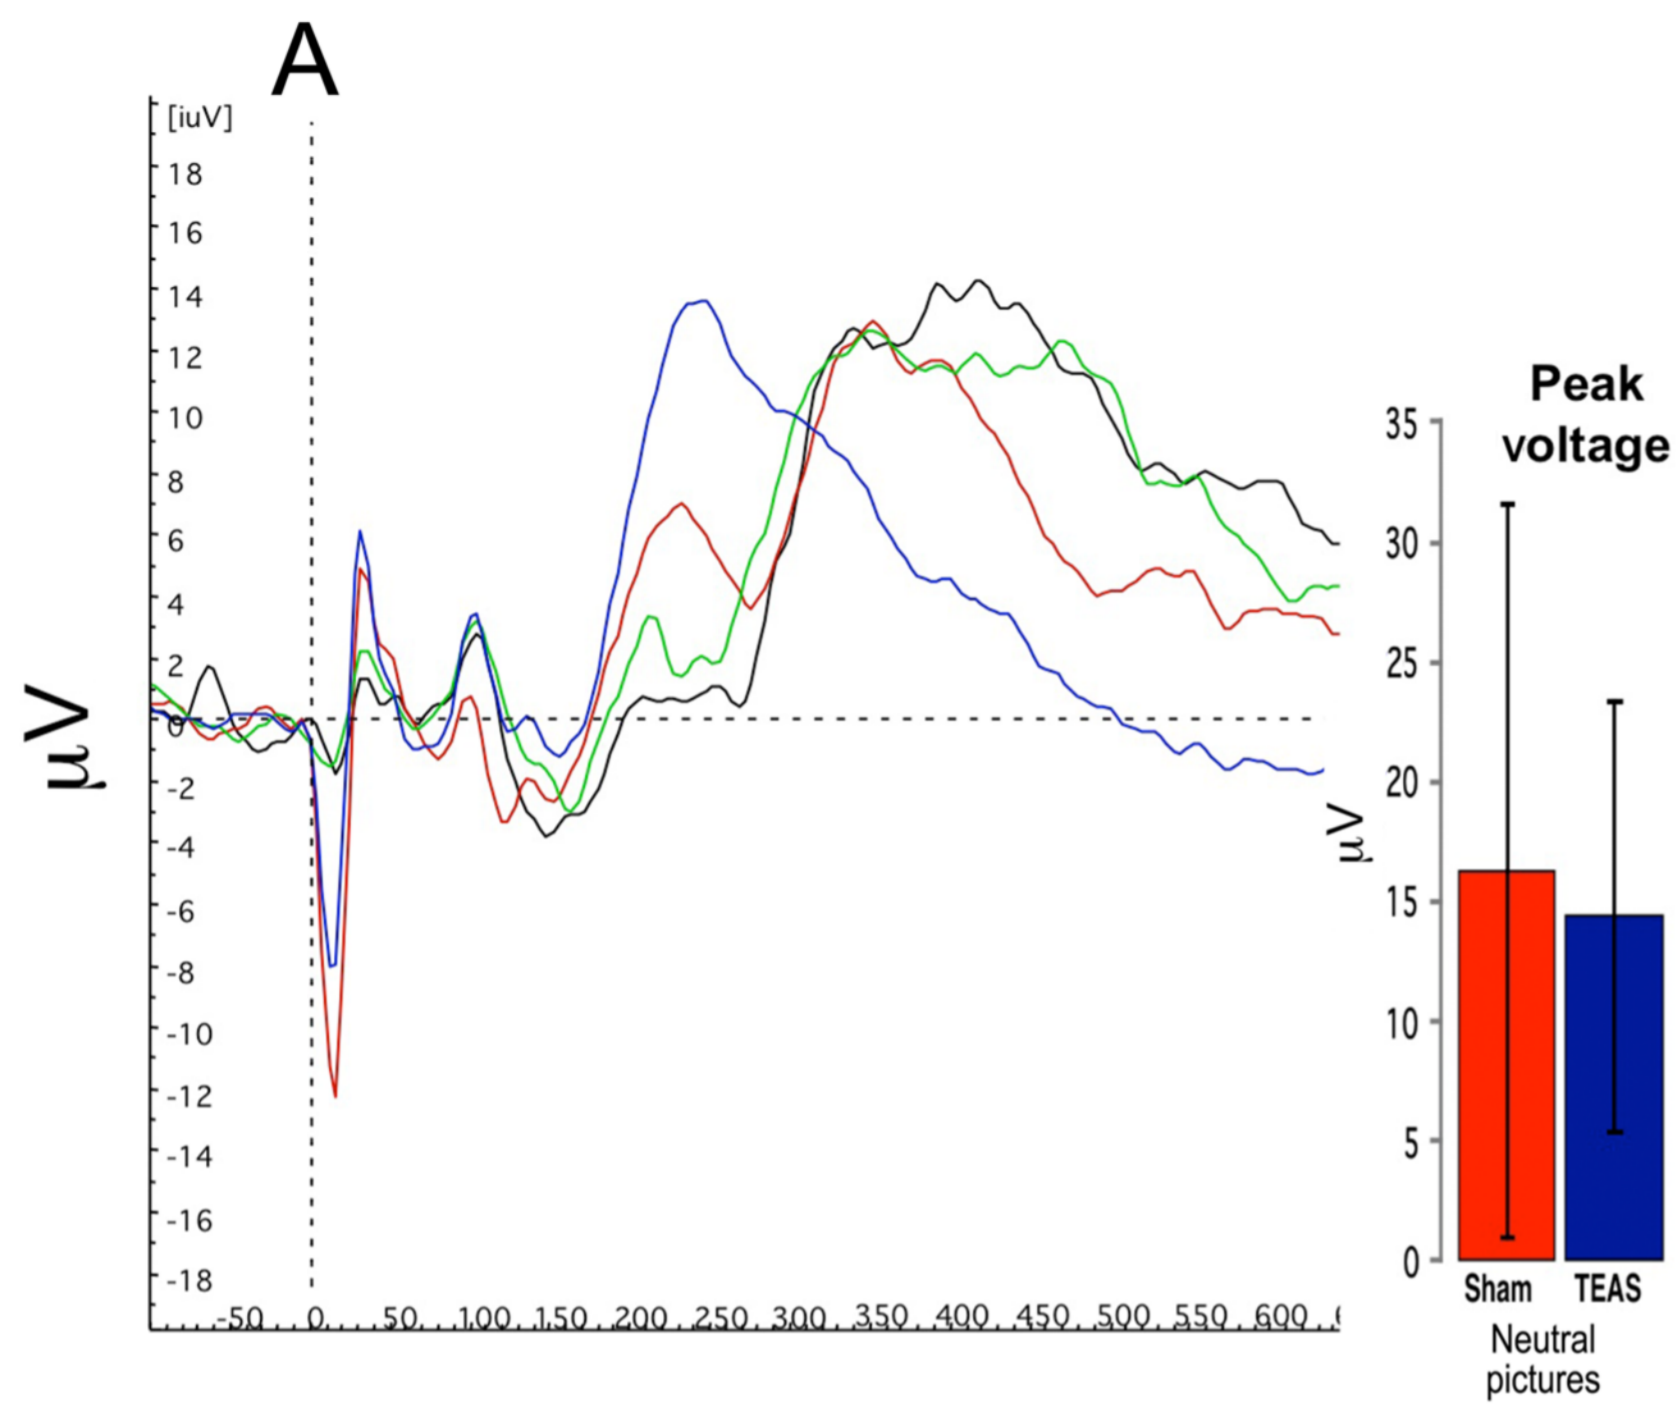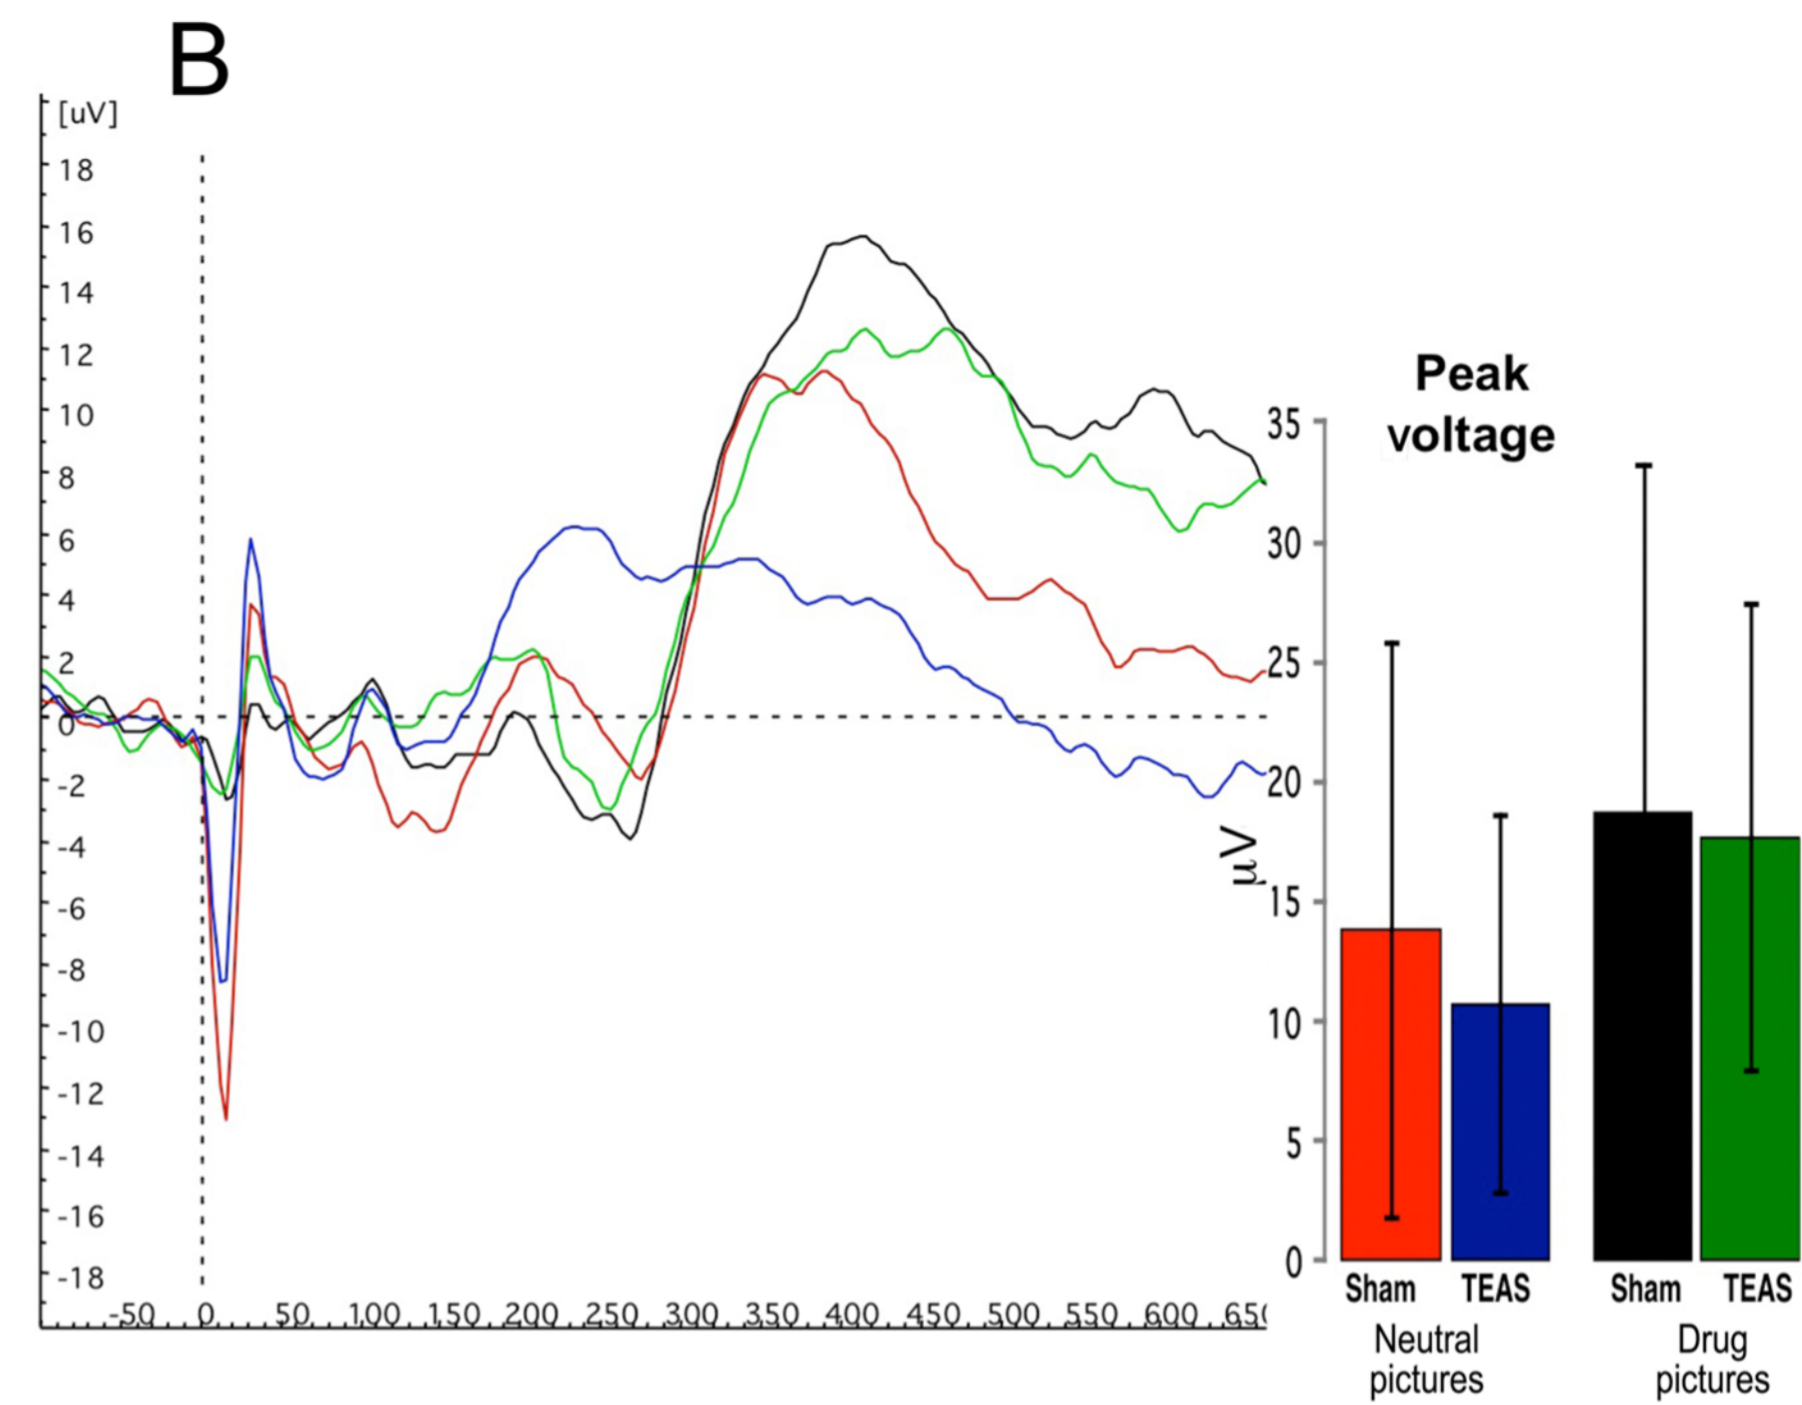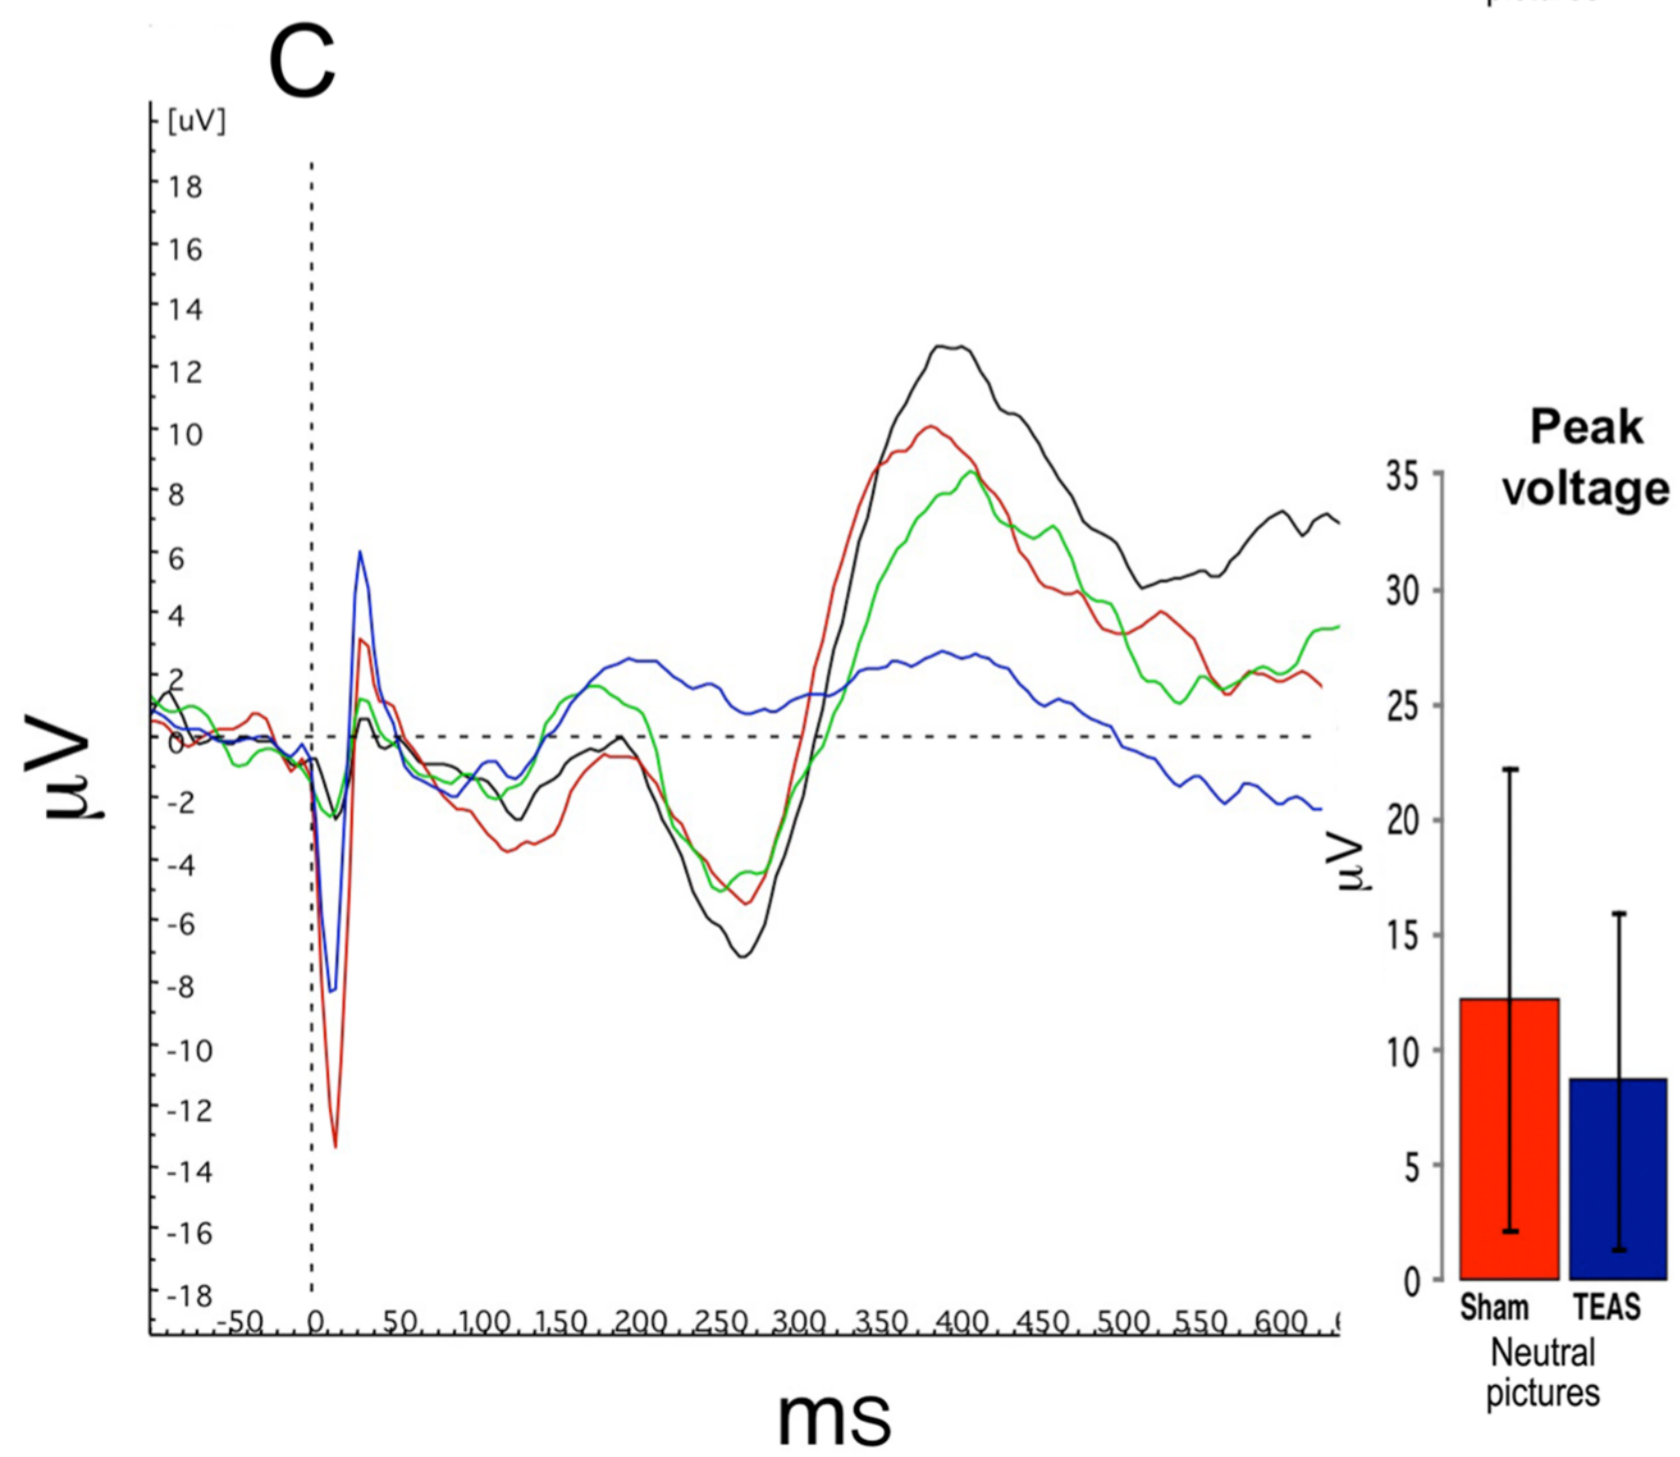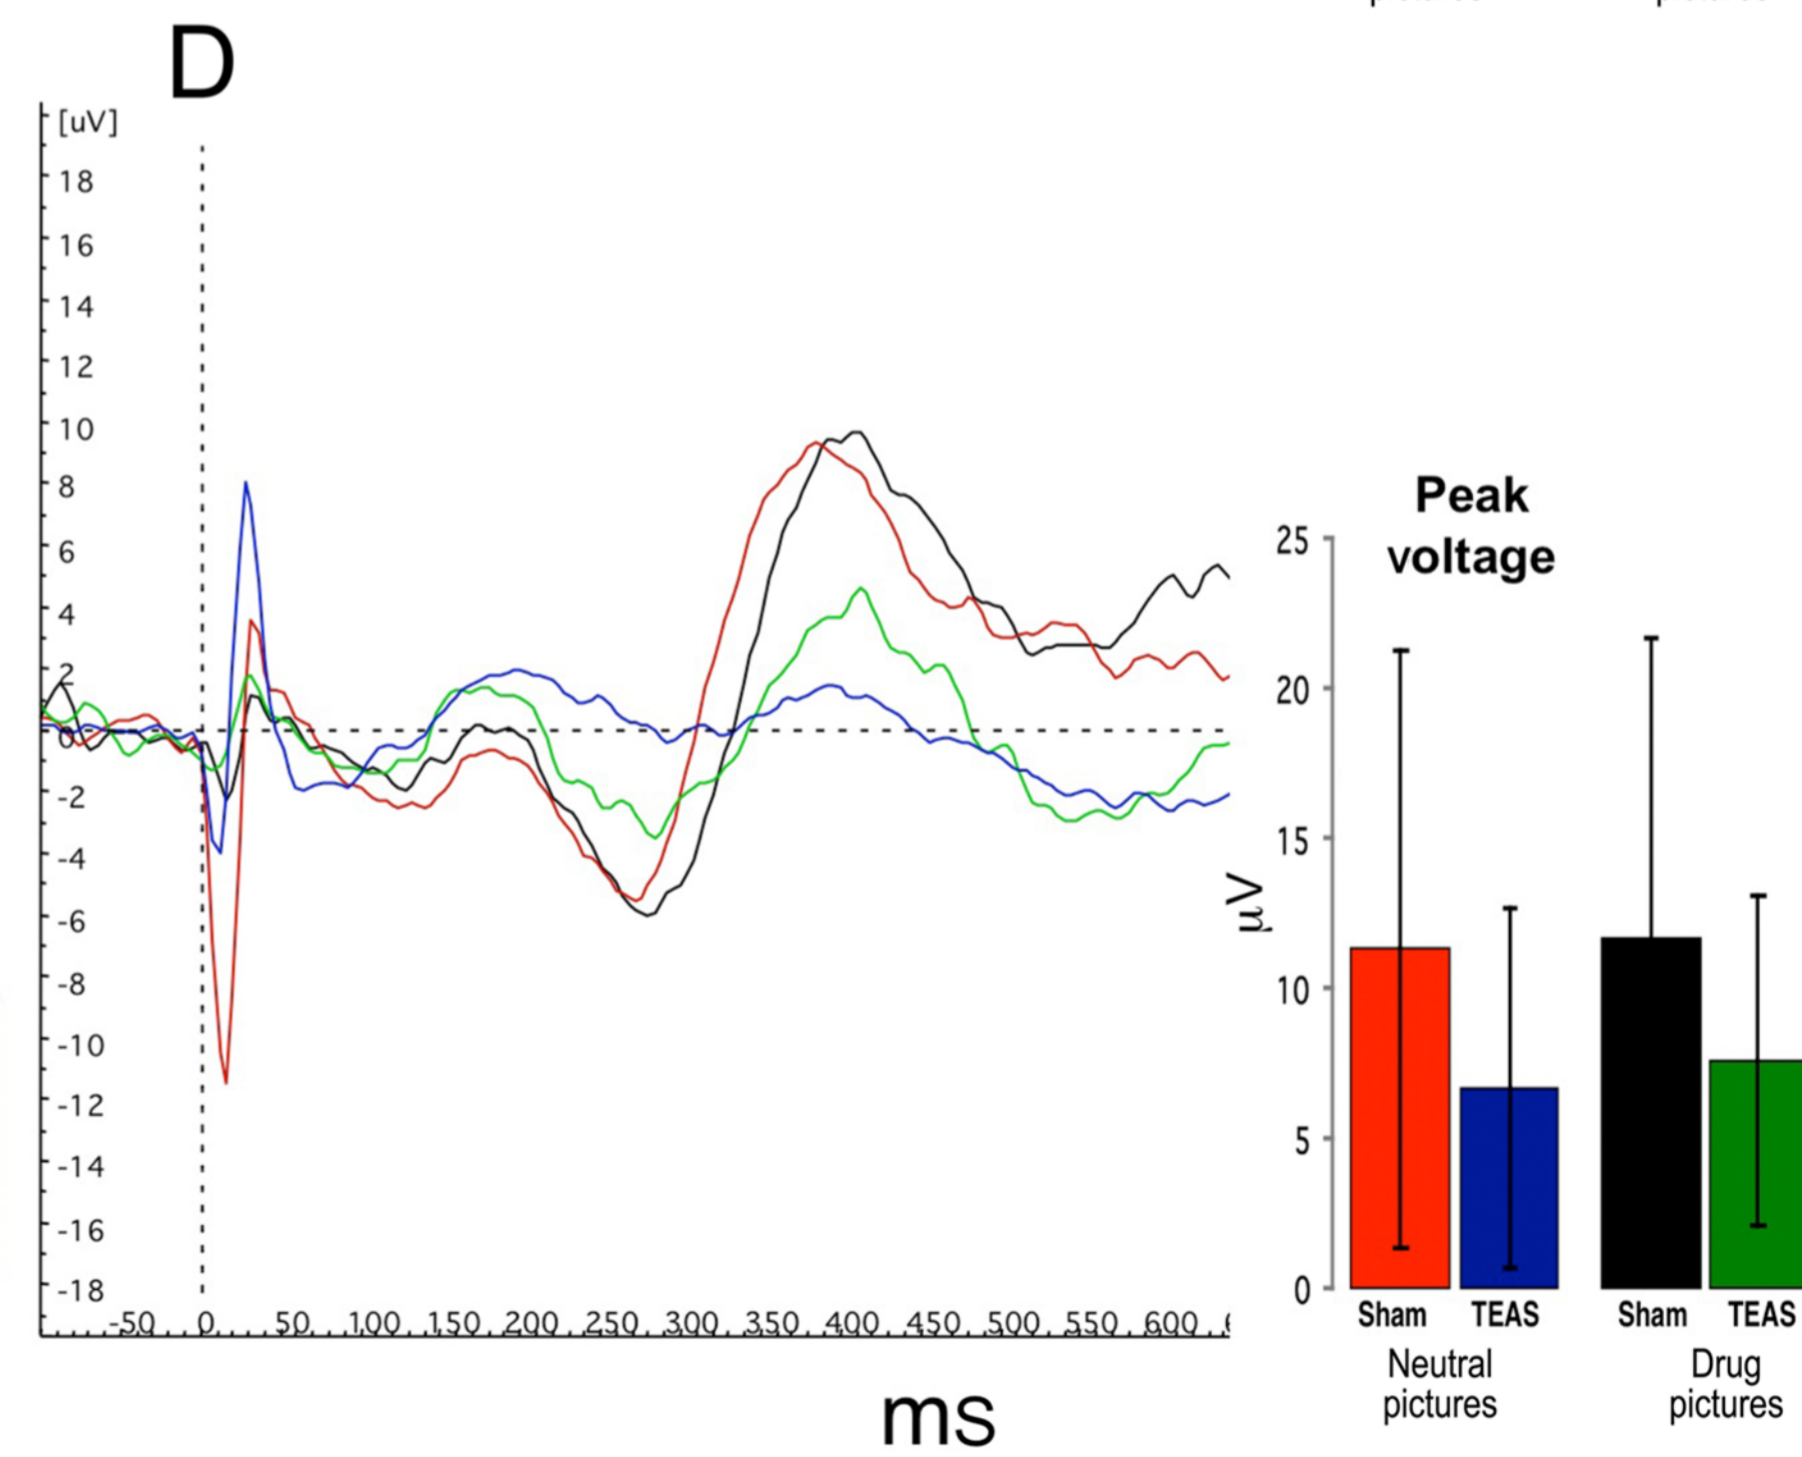

Supplement: MOESM6 [file 9641098]
